# Supplementary material
Source: Springer Nature journal article supplement (https://www.springermedizin.de/resource/supplementary/13012_2007_84_MOESM1_ESM.pdf/9629208)
Supplement: MOESM1 [file 9629208]

## CONSORT Checklist of items to include when reporting a cluster randomised trial

(Campbell MK, Elbourne DR, Altman DG: CONSORT statement: extension to cluster randomised trials. BMJ 2004, 328(7441):702-708.)

| Paper section and topic   | Item | Descriptor [section title] <sup>1</sup>                                                                                                                                                                                                                                                                                                                                              |
|---------------------------|------|--------------------------------------------------------------------------------------------------------------------------------------------------------------------------------------------------------------------------------------------------------------------------------------------------------------------------------------------------------------------------------------|
| <b>Title and abstract</b> |      |                                                                                                                                                                                                                                                                                                                                                                                      |
| Design                    | 1    | How participants were allocated to interventions (eg random allocation, randomised, or randomly assigned), specifying that allocation was based on clusters [ <b>Title; Abstract</b> ].                                                                                                                                                                                              |
| <b>Introduction</b>       |      |                                                                                                                                                                                                                                                                                                                                                                                      |
| Background                | 2    | Scientific background and explanation of rationale [ <b>Background</b> ], including the rationale for using a cluster design [ <b>Trial design</b> ].                                                                                                                                                                                                                                |
| <b>Methods</b>            |      |                                                                                                                                                                                                                                                                                                                                                                                      |
| Participants              | 3    | Eligibility criteria for participants and clusters [ <b>Inclusion criteria; Exclusion criteria</b> ] and the settings and locations where the data were collected [ <b>Recruitment of general practices; Recruitment of patient participants</b> ].                                                                                                                                  |
| Interventions             | 4    | Precise details of the interventions intended for each group, whether they pertain to the individual level, the cluster level, or both, and how [ <b>Control group; Intervention group</b> ] and when they were actually administered [ <b>Timing of recruitment, intervention delivery and follow-up</b> ].                                                                         |
| Objectives                | 5    | Specific objectives and hypotheses and whether they pertain to the individual level, the cluster level, or both [ <b>Trial objectives</b> ].                                                                                                                                                                                                                                         |
| Outcomes                  | 6    | Report clearly defined primary and secondary outcome measures, whether they pertain to the individual level, the cluster level, or both [ <b>Primary outcome measures; Secondary outcome measures; Table 1</b> ], and, when applicable, any methods used to enhance the quality of measurements (eg multiple observations, training of assessors) [ <b>Data quality assurance</b> ]. |
| Sample size               | 7    | How total sample size was determined (including method of calculation, number of clusters, cluster size, a coefficient of intracluster correlation (ICC or k), and an indication of its uncertainty) and, when applicable, explanation of any interim analyses and stopping rules [ <b>Sample size</b> ].                                                                            |
| Randomization             |      |                                                                                                                                                                                                                                                                                                                                                                                      |
| Sequence generation       | 8    | Method used to generate the random allocation sequence, including details of any restriction (eg blocking, stratification, matching) [ <b>Randomisation and allocation concealment</b> ].                                                                                                                                                                                            |
| Allocation concealment    | 9    | Method used to implement the random allocation sequence, specifying that allocation was based on clusters rather than individuals and clarifying whether the sequence was concealed until interventions were assigned [ <b>Randomisation and allocation concealment</b> ].                                                                                                           |
| Implementation            | 10   | Who generated the allocation sequence [ <b>Randomisation and allocation concealment</b> ], who enrolled participants [ <b>Recruitment of general practices; Recruitment of patient participants; Applying the eligibility criteria</b> ], and who assigned participants to their groups [ <b>Randomisation and allocation concealment</b> ].                                         |
| Blinding (masking)        | 11   | Whether participants, those administering the interventions, and those assessing the outcomes were blinded to group assignment [ <b>Blinding</b> ]. If done, how the success of blinding was evaluated.                                                                                                                                                                              |
| Statistical methods       | 12   | Statistical methods used to compare groups for primary outcome(s) indicating how clustering was taken into account; methods for additional analyses, such as subgroup analyses and adjusted analyses [ <b>Analyses</b> ].                                                                                                                                                            |

<sup>1</sup> The bold text in square brackets refers to the section title within the publication.
